# Supplementary material
Source: Springer Nature journal article supplement (https://www.springermedizin.de/resource/supplementary/12916_2011_569_MOESM1_ESM.PDF/9598170)
Supplement: MOESM1 [file 9598170]

Figure S1

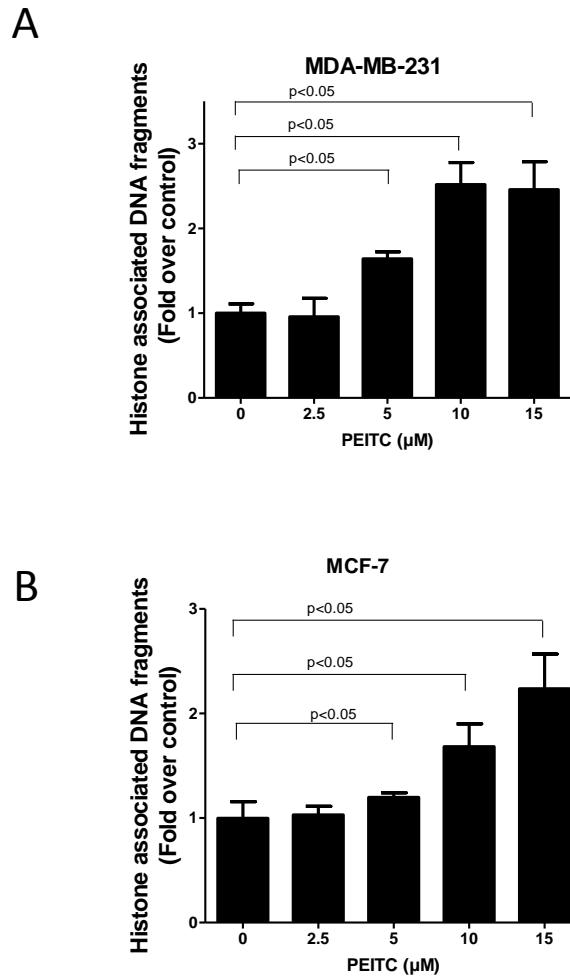

**Figure S1: PEITC induces histone associated fragmentation in breast cancer cells.** Apoptosis induction was measured by ELISA cell death detection method in (A) MDA-MB-231 and (B) MCF-7 (n=3). Each experiment was repeated more than three times independently. \*Statistically different when compared with control ( $p < 0.05$ ).
